# Supplementary material for: Modelled glacier equilibrium line altitudes during the mid-Holocene in the southern mid-latitudes
Source: Copernicus journal article supplement (doi:10.5194/cp-11-1575-2015), 2015-11-26
Supplement: Supplementary file 1 [file cp-11-1575-2015-supplement.zip]

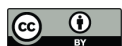

## *Supplement of*

# **Modelled glacier equilibrium line altitudes during the mid-Holocene in the southern mid-latitudes**

**C. Bravo et al.**

*Correspondence to:* C. Bravo ([claudio@dgf.uchile.cl](mailto:claudio@dgf.uchile.cl))

- [cp-11-1575-2015-supplement-title-page.pdf](#)
- [Supplement.docx](#)
- [fig\\_s\\_1.png](#)
- [fig\\_s\\_2.png](#)
- [fig\\_s\\_3.png](#)
- [fig\\_s\\_4.png](#)

The copyright of individual parts of the supplement might differ from the CC-BY 3.0 licence.
